# Supplementary material
Source: Springer Nature journal article supplement (https://www.springermedizin.de/resource/supplementary/12960_2007_99_MOESM1_ESM.pdf/9570468)

*Beliefs/s/he is a role model*  
*Nurses should stay if gov't paid for their education*  
*Governmental primary school*

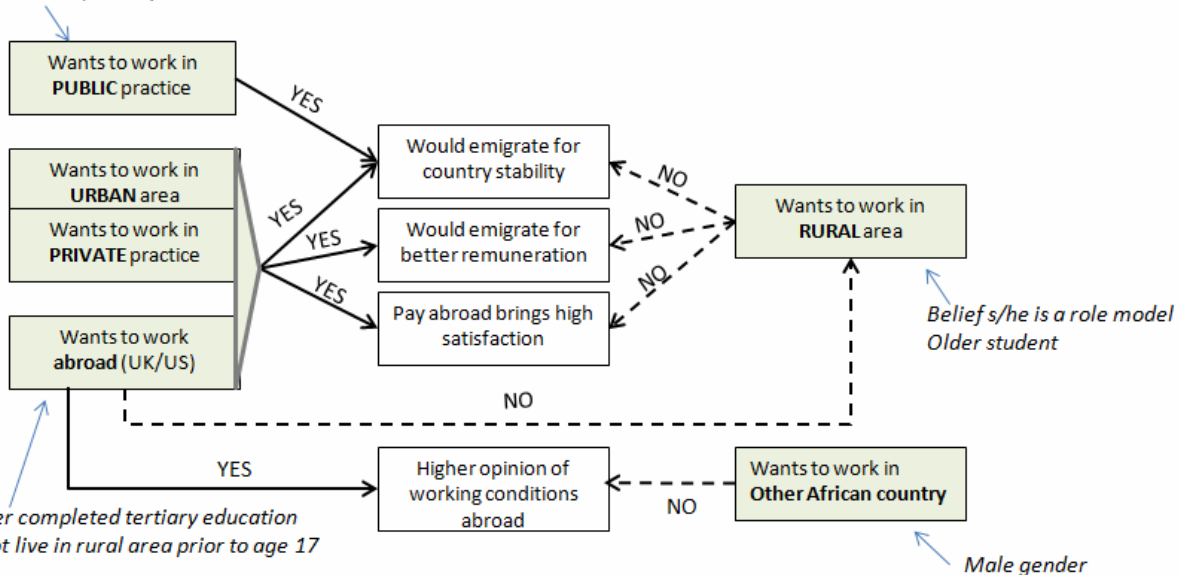

Supplement: MOESM1 [file 9570468]
